# Supplementary material
Source: publisher figshare collection journal article supplement (https://frontiersin.figshare.com/ndownloader/files/34919862)
Supplement: Supplementary file [file 34919862]

# Supplementary Material

## Supplementary Figures

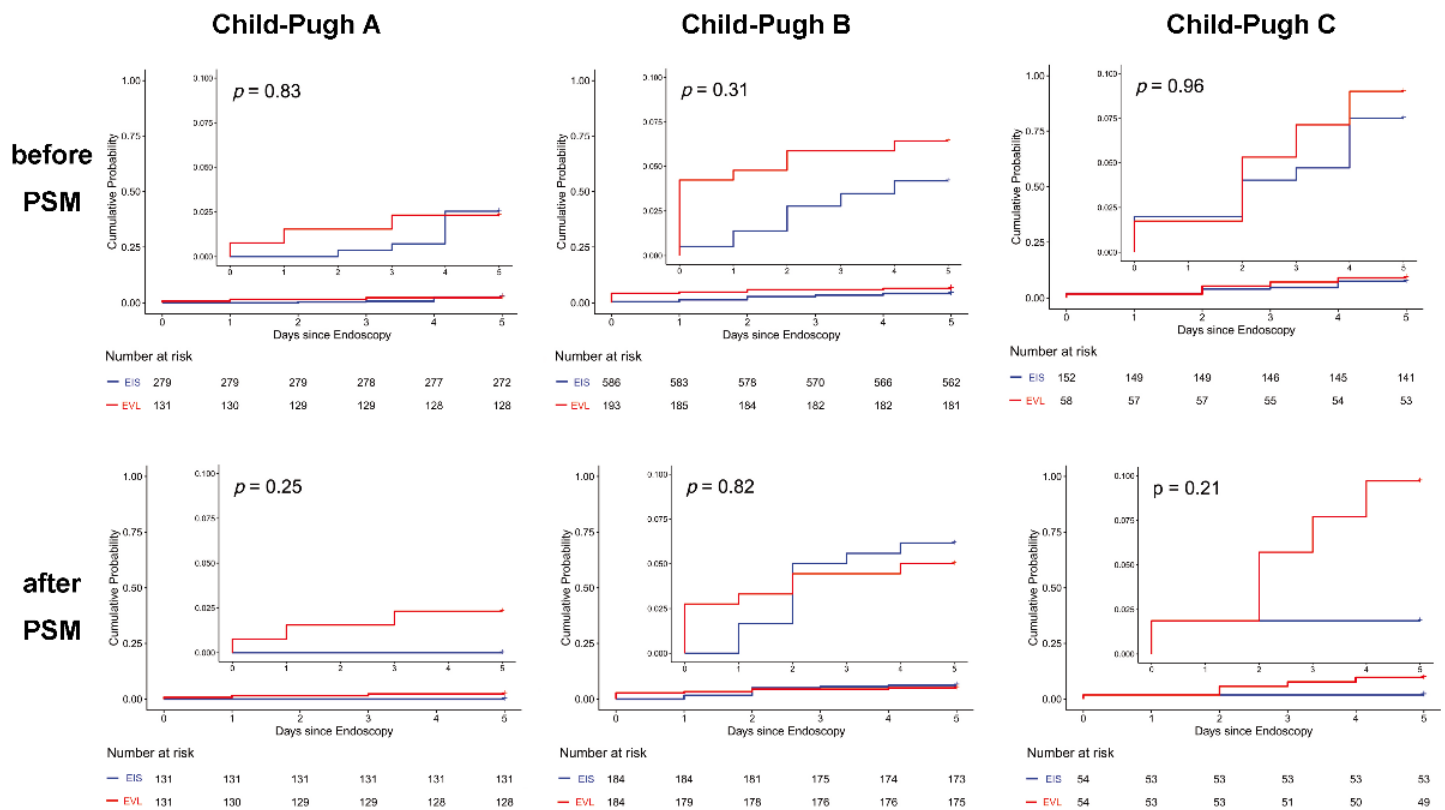

**Supplementary Figure 1.** Cumulative probability of 5-day rebleeding in Child-Pugh A, B or C patients with cirrhosis.

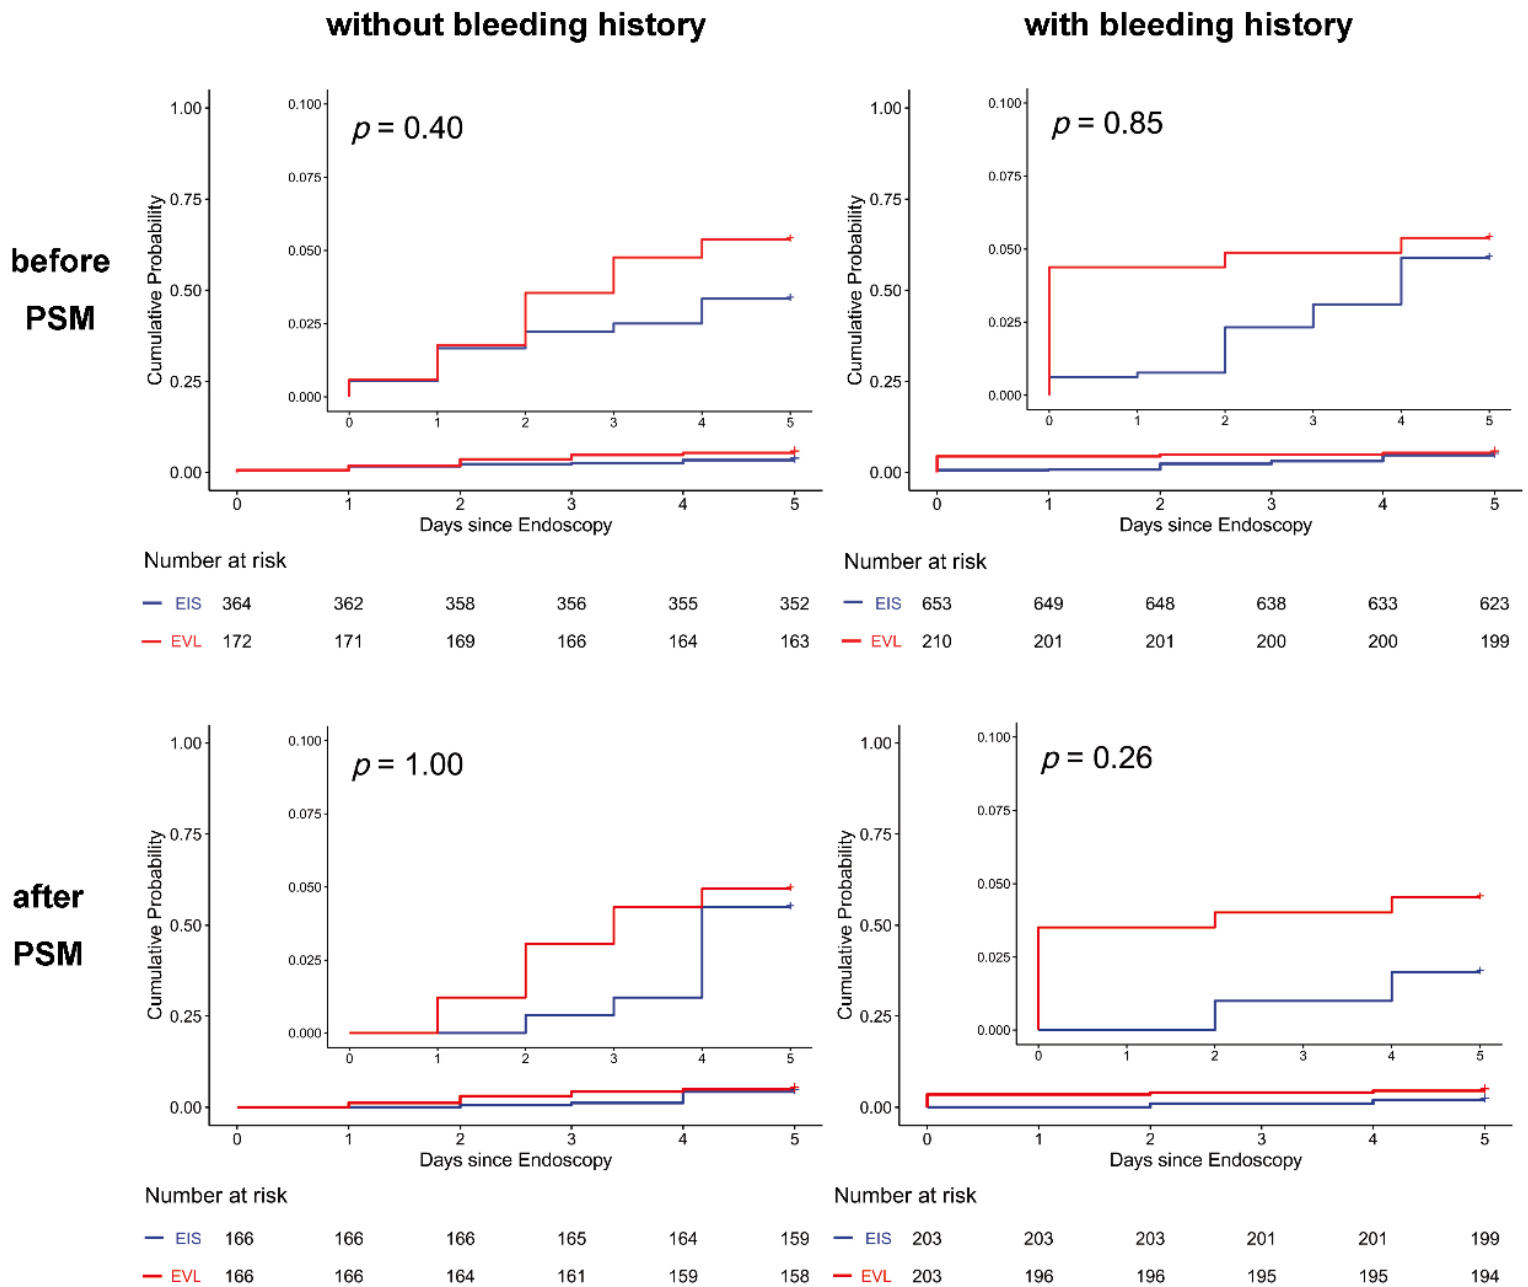

**Supplementary Figure 2.** Cumulative probability of 5-day rebleeding in cirrhotic patients with or without a bleeding history.
